# Supplementary material for: Graphdiyne-supported single-cluster electrocatalysts for highly efficient carbon dioxide reduction reaction
Source: Royal Society of Chemistry journal article supplement (doi:10.1039/d1nr05200d), 2021-12-13
Supplement: d1nr05200d1.pdf [file d1nr05200d1.pdf]

## Nanoscale

### ARTICLE

# Graphdiyne-supported single-cluster electrocatalysts for highly efficient carbon dioxide reduction reaction

Received 00th January 20xx,  
Accepted 00th January 20xx

DOI: 10.1039/x0xx00000x

Pingji Ge,<sup>a,b</sup> Xingwu Zhai,<sup>a,b</sup> Xiaoyue Liu,<sup>a,b</sup> Yinglun Liu,<sup>a,b</sup> Xiaodong Yang,<sup>a,b</sup> Hongxia Yan,<sup>a,b</sup> Guixian Ge,<sup>\*,a,b</sup> Jueming Yang,<sup>\*,a,b</sup> and Yunhu Liu,<sup>\*,a,b</sup>

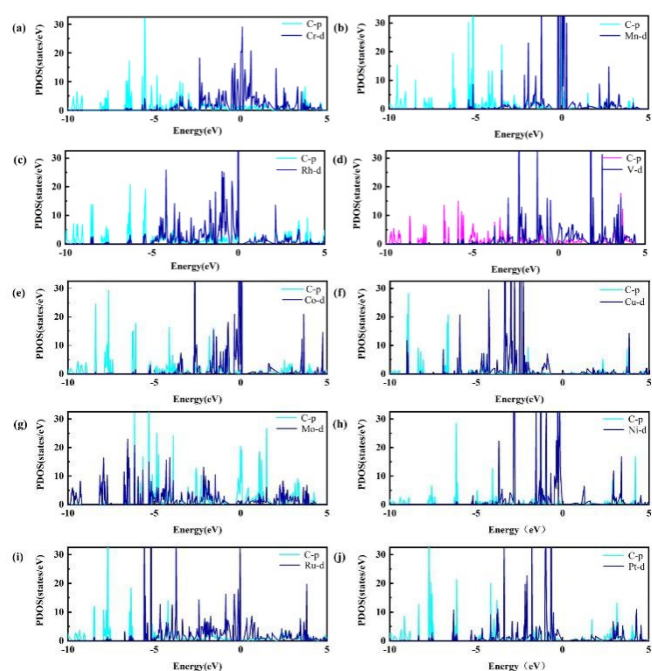

Fig.S1. Projected density of states (PDOS) of C-p orbital and TM-d orbital for  $TM_3@GDY$ .

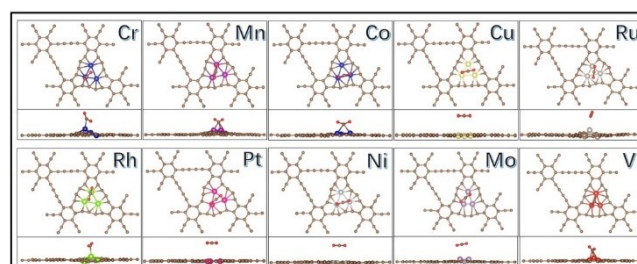

Fig. S2 The most stable configurations of top views and side views of adsorbed  $CO_2$  on  $TM_3@GDY$

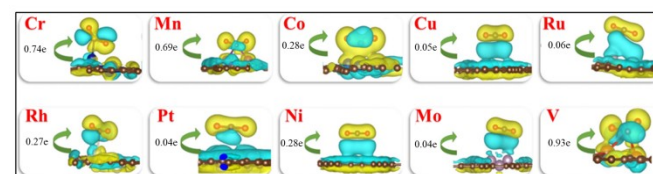

Fig. S3 The Bader charge analysis. The isosurface value is set to be 0.01  $e/\text{\AA}$  and the positive and negative charges are shown in yellow and cyan, respectively.

<sup>a</sup> Key Laboratory of Ecophysics and Department of Physics, College of Science, Shihezi University North fourth Road, Shihezi City, P.R. China  
E-mail: [geguixian@126.com](mailto:geguixian@126.com), [juemingyang11@gmail.com](mailto:juemingyang11@gmail.com), [liuyh@shzu.edu.cn](mailto:liuyh@shzu.edu.cn)

<sup>b</sup> Xinjiang Production and Construction Corps Key Laboratory of Oasis Town and Mountain-basin System Ecology, Shihezi University North fourth Road, Shihezi City, P.R. China  
E-mail: [geguixian@126.com](mailto:geguixian@126.com), [juemingyang11@gmail.com](mailto:juemingyang11@gmail.com), [liuyh@shzu.edu.cn](mailto:liuyh@shzu.edu.cn)

†Electronic Supplementary Information (ESI) available. See DOI: 10.1039/x0xx00000x

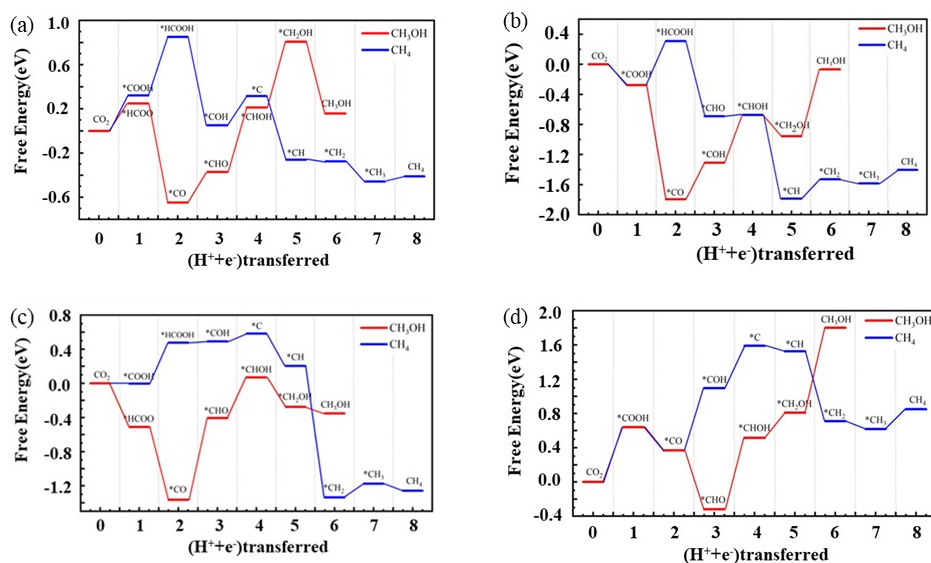

Fig. S4 Free-energy profiles for CO<sub>2</sub>RR on (a)Mn<sub>3</sub>@GDY, (b)Co<sub>3</sub>@GDY, (c)Ru<sub>3</sub>@GDY and (d)V<sub>3</sub>@GDY.

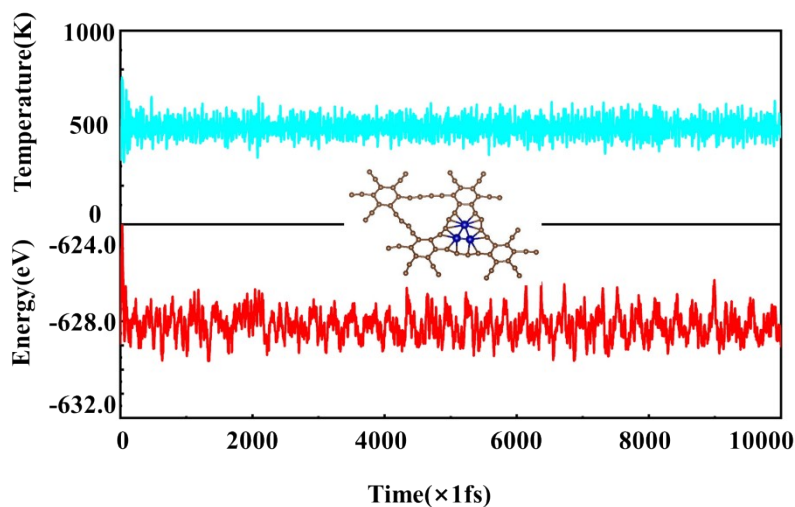

Fig. S5 The temperature and energy fluctuations of Cr<sub>3</sub>@GDY during 10 ps of AIMD simulation. The insets illustrate the top and side view of Cr<sub>3</sub>@GDY after 10 ps AIMD simulation at T = 500 K.

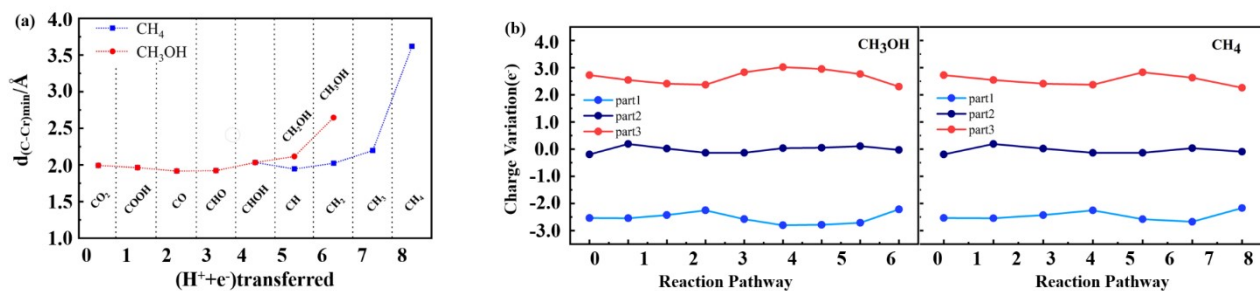

Fig. 56. (a) The variations of the C-TM (the closest TM atom of the adsorbed product) bond lengths through reaction pathway. (b). The Bader charge analysis for three parts of  $Cr_3@GDY$  along the reaction pathway.

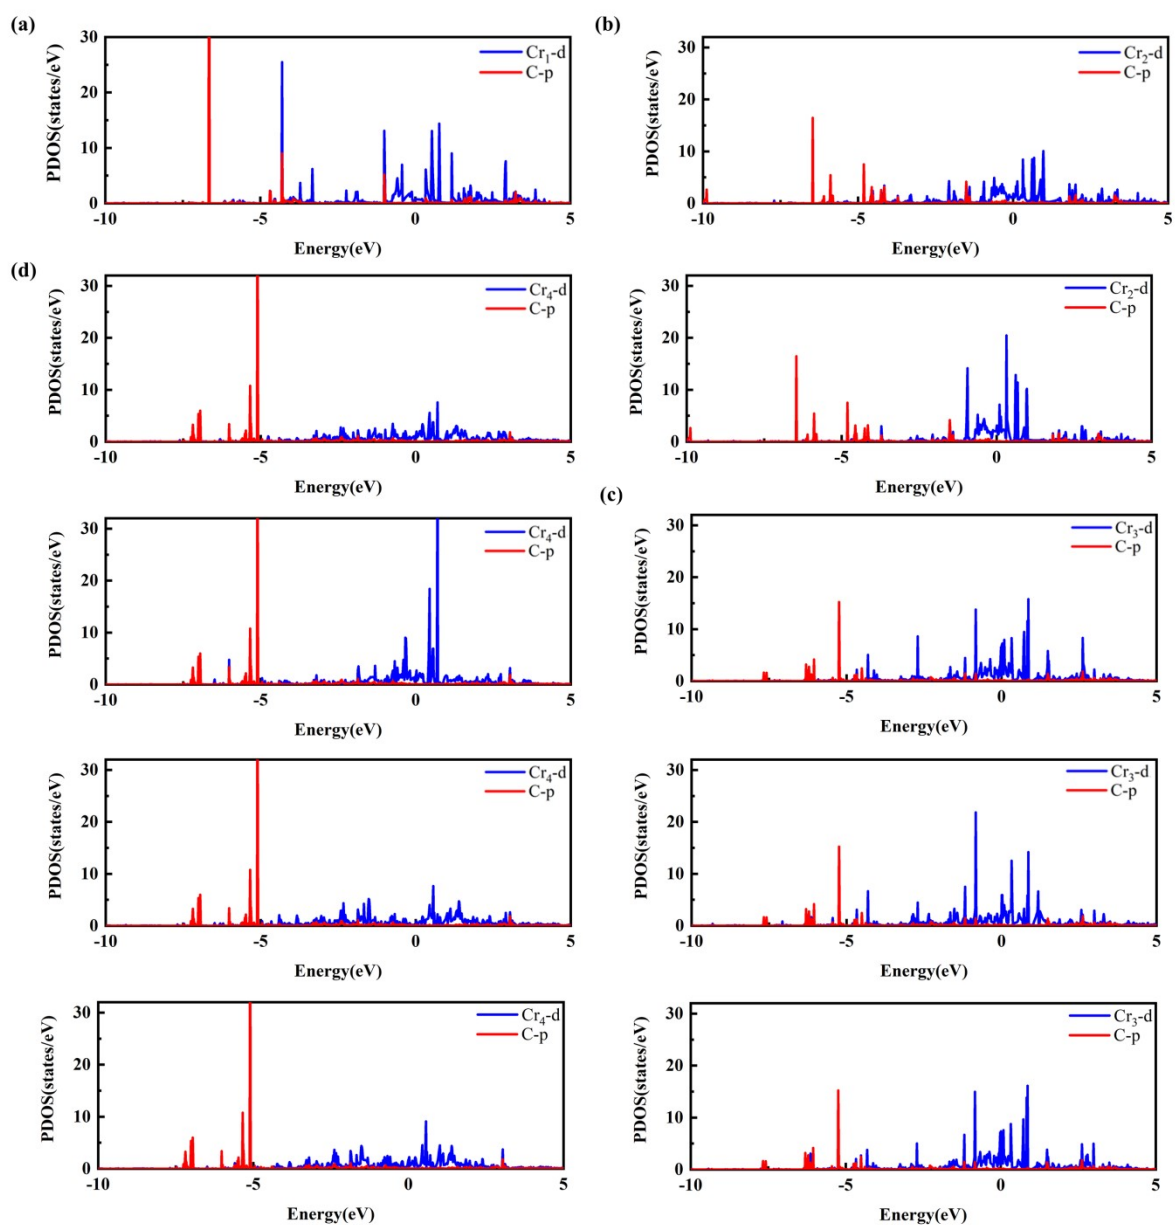

Fig. 57. Projected density of states (PDOS) of C-p orbital and Cr-d orbital of each Cr atom after CHO generation on (a)  $Cr_1@GDY$ , (b)  $Cr_2@GDY$ , (c)  $Cr_3@GDY$  and (d)  $Cr_4@GDY$ .

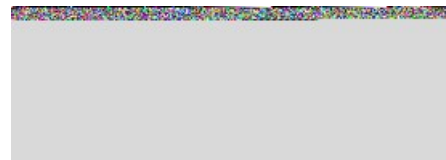

## Nanoscale

### ARTICLE

**Table S1.** The binding energies (eV) of  $\text{TM}_3@$ GDY and cohesive energies (eV) of the corresponding bulk metal.

| Catalysts          | binding energies | cohesive energies |
|--------------------|------------------|-------------------|
| $\text{Mn}_3@$ GDY | -9.34            | -7.80             |
| $\text{Cr}_3@$ GDY | -8.48            | -7.70             |
| $\text{Co}_3@$ GDY | -14.40           | -9.44             |
| $\text{Rh}_3@$ GDY | -14.42           | -25.84            |
| $\text{Ru}_3@$ GDY | -17.88           | -14.78            |
| $\text{V}_3@$ GDY  | -19.03           | -14.54            |
| $\text{Pt}_3@$ GDY | -22.89           | -22.19            |
| $\text{Mo}_3@$ GDY | -16.84           | -14.72            |
| $\text{Cu}_3@$ GDY | -18.19           | -14.84            |
| $\text{Ni}_3@$ GDY | -14.48           | -21.84            |

**Table S2.** The adsorption energies ( $E_{\text{ads}}$ , eV), O-C-O bond angles (angles, °), and charge transfers of  $\text{CO}_2$  ( $Q$ , |e|) of the most stable  $\text{CO}_2$  adsorption configurations on  $\text{TM}_3@$ GDY.

| Catalysts          | $E_{\text{ads}}$ | angles | $Q$  |
|--------------------|------------------|--------|------|
| $\text{Mn}_3@$ GDY | -1.05            | 138.22 | 0.69 |
| $\text{Cr}_3@$ GDY | -0.79            | 137.12 | 0.74 |
| $\text{Co}_3@$ GDY | 0.11             | 139.10 | 0.28 |
| $\text{Rh}_3@$ GDY | -0.21            | 179.57 | 0.04 |
| $\text{Ru}_3@$ GDY | -0.16            | 178.61 | 0.06 |
| $\text{V}_3@$ GDY  | -1.24            | 155.07 | 0.27 |
| $\text{Pt}_3@$ GDY | -0.31            | 178.93 | 0.04 |
| $\text{Mo}_3@$ GDY | -0.22            | 179.40 | 0.04 |
| $\text{Cu}_3@$ GDY | -0.28            | 179.39 | 0.05 |
| $\text{Ni}_3@$ GDY | -0.24            | 128.57 | 0.83 |

**Table S3.** The maximum free energy change ( $\Delta G_{\text{max}}$ , eV) and corresponding step of  $\text{TM}_3@$ GDY.

| Catalysts          | $\Delta G_{\text{max}}$ | Step                    |
|--------------------|-------------------------|-------------------------|
| $\text{Mn}_3@$ GDY | 0.53                    | *CHO-*CHOH              |
| $\text{Cr}_3@$ GDY | 0.39                    | *CHO-*CHOH              |
| $\text{Co}_3@$ GDY | 0.48                    | *CO-*CHO                |
| $\text{Rh}_3@$ GDY | 0.99                    | *CO-*CHO                |
| $\text{Ru}_3@$ GDY | 0.48                    | *CHO-*CHOH              |
| $\text{V}_3@$ GDY  | 0.72                    | *CHO-*CHOH              |
| $\text{Pt}_3@$ GDY | 2.09                    | *CO <sub>2</sub> -*COOH |
| $\text{Mo}_3@$ GDY | 2.58                    | *CHO-*CHOH              |
| $\text{Cu}_3@$ GDY | 1.26                    | *CO <sub>2</sub> -*COOH |
| $\text{Ni}_3@$ GDY | 1.10                    | *CO <sub>2</sub> -*COOH |

## Nanoscale

### ARTICLE

**Table S4.** Energy change ( $\Delta G$ , eV) of CO desorption and further reaction step for  $\text{Cr}_3\text{@GDY}$ .

| step          | $\Delta G$ |
|---------------|------------|
| *CO-*CHO      | 0.30       |
| *CO-*COH      | 1.91       |
| CO desorption | 1.45       |
